# Supplementary material
Source: PubMed Central journal article supplement (PMC4162749)

Figure S1

MCF7

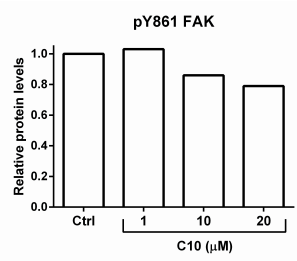

MCF7-VEGFR3

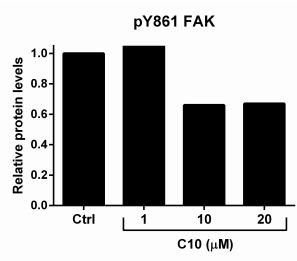

MiaPaCa-2-luc

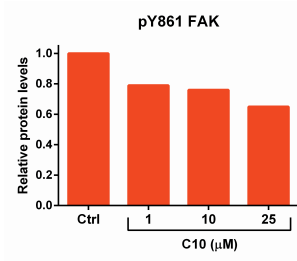

BxPC3

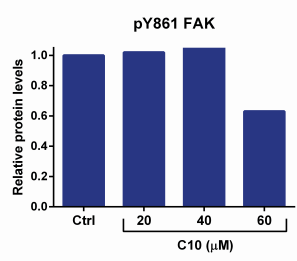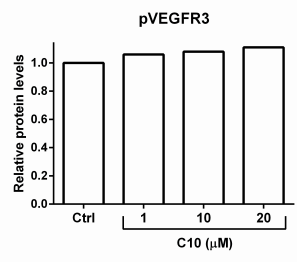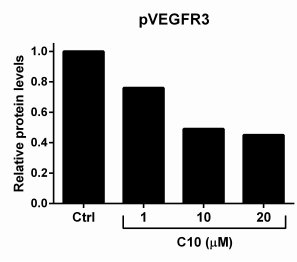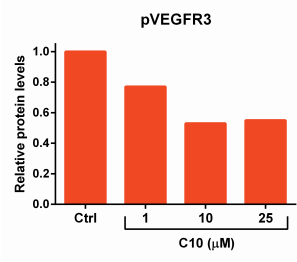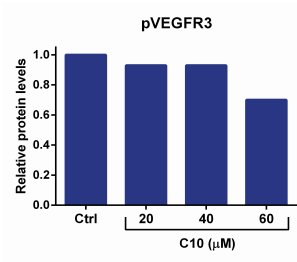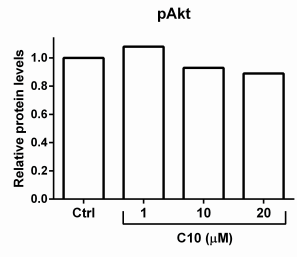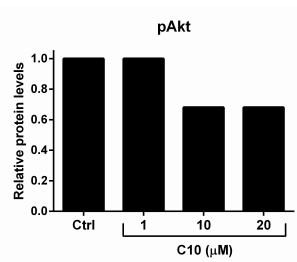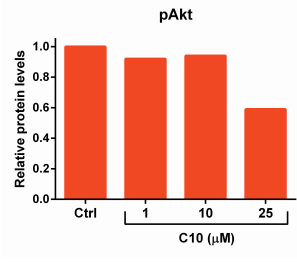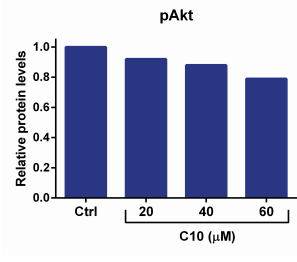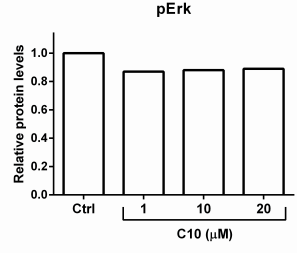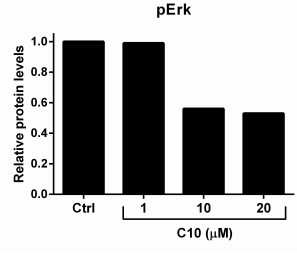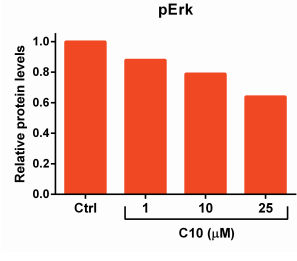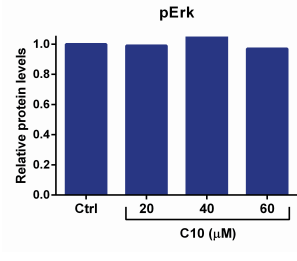

Supplement: NIHMS619530-supplement-01.pdf [file NIHMS619530-supplement-01.pdf]

Figure S2

A

CD31

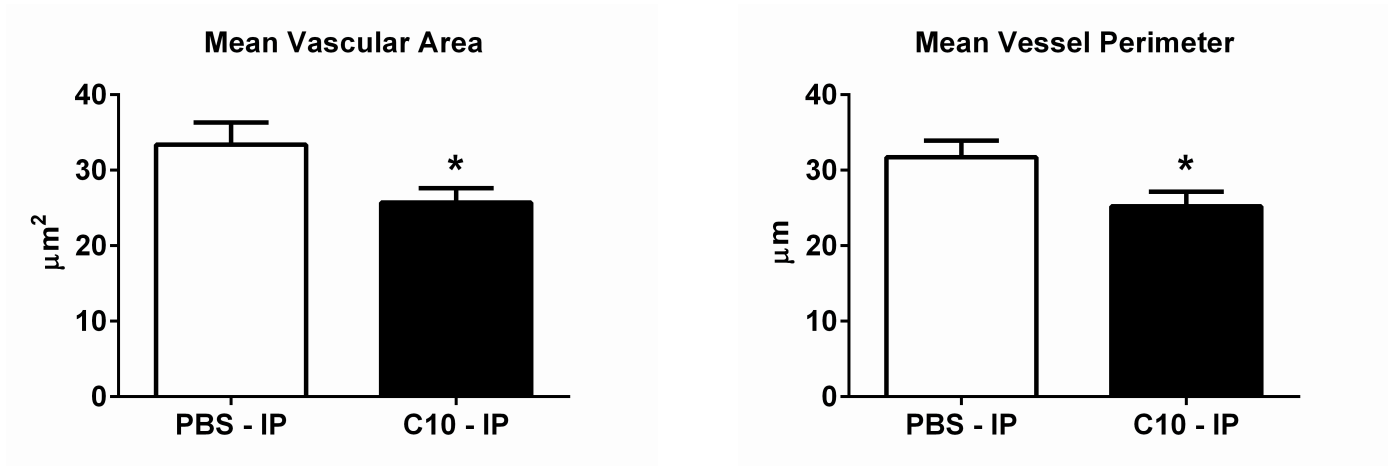

B

LYVE1

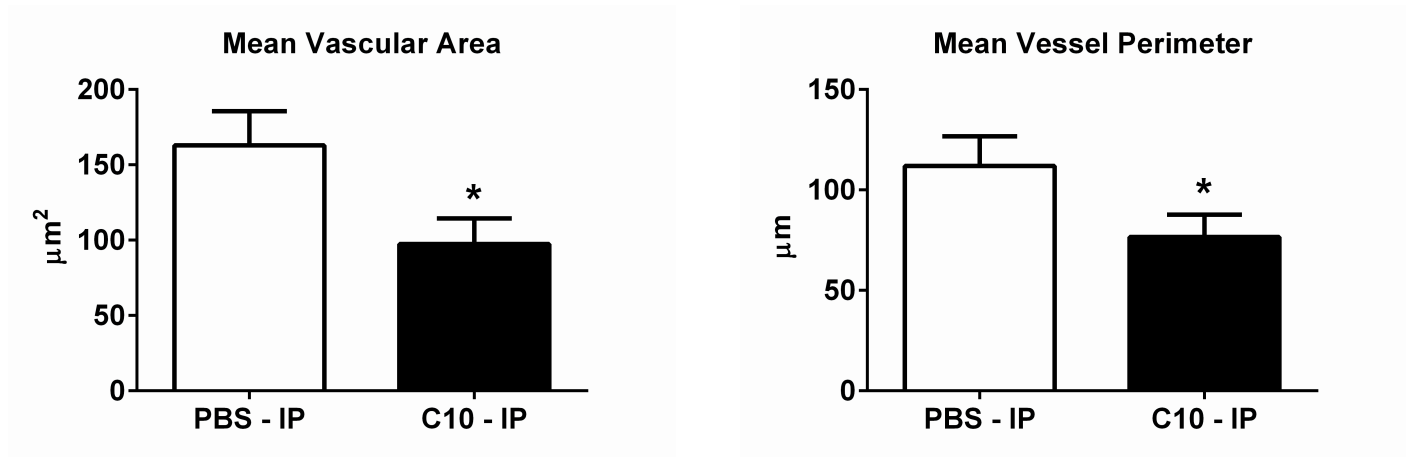

Supplement: NIHMS619530-supplement-02.pdf [file NIHMS619530-supplement-02.pdf]

Figure S3

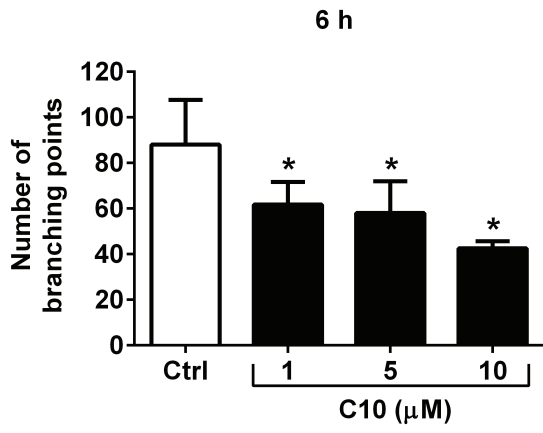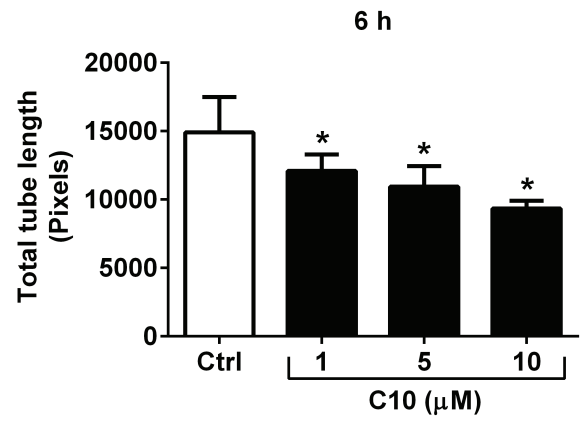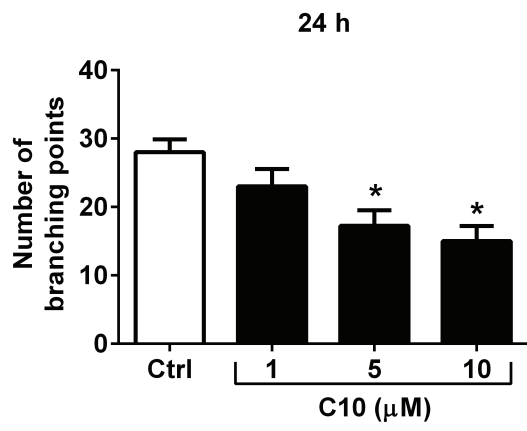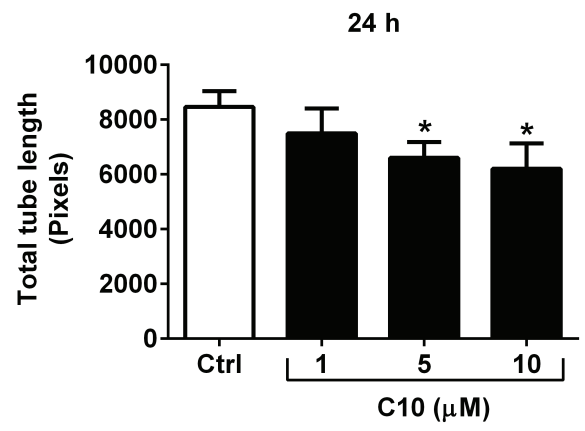

Supplement: NIHMS619530-supplement-03.pdf [file NIHMS619530-supplement-03.pdf]
